# Supplementary material for: The Genetic Basis of Host Preference and Resting Behavior in the Major African Malaria Vector, Anopheles arabiensis
Source: PLoS Genet. 2016 Sep 15;12(9):e1006303. doi: 10.1371/journal.pgen.1006303 (PMC5025075; doi:10.1371/journal.pgen.1006303)
Supplement: S11 Table — This table summarizes the results from the generalized linear mixed model (GLMM), which tested for environmental effects on host preference and resting behavior. The proportion of human-fed An. arabiensis varied by household and was inversely correlated with the presence of livestock (P<0.0001). The frequency of human fed mosquitoes was also correlated with trapping location–less human-fed mosquitoes were collected in outdoor traps (P = 0.0083). (XLSX) [file pgen.1006303.s011.xlsx]

## Sheet: Sheet1
Table S11: Results of the final model for host choice in An. arabiensis showing significant variables, coefficient, p-value, predicted estimate with confidence interval and Chi-square test results.
Variable	Coefficient	SE	P-value	χ2-value	P-value (χ2)	Predicted	CI-2.5%	CI-97.5%
livestock	-1.9227	0.4368	<0.0001	0.5	0.33	0.13	0.06	0.26
Location in	0.0198	0.355	0.9555	10.63	<0.0001	0.5	0.33	0.67
Location Out	-0.7349	0.2784	0.0083	6.5	0.01	0.32	0.21	0.45
